# Supplementary material
Source: publisher figshare collection journal article supplement (https://tandf.figshare.com/ndownloader/files/14689763)
Supplement: Supplementary file 1 [file 14689763]

**(Supplementary Table 1) Multivariate logistic regression by gender (after excluding people with LVH)**

|  | **Males**  N=2884 | | **Females**  N=2950 |  |
| --- | --- | --- | --- | --- |
|  | **2nd Tertile (n=839)**  **versus 1st tertile (n=1,237)** | **3rd Tertile**  **(n=807)**  **versus 1st tertile (n=1,237)** | **2nd Tertile**  **(n=827)**  **versus 1st tertile (n=1,399)** | **3rd Tertile**  **(n=723)**  **versus 1st tertile (n=1,399)** |
| **Log (Lead)*** | 0.98 (0.74-1.29) | 1.33 (1.00 - 1.79) | 0.96 (0.74-1.24) | 1.02 (0.75-1.40) |

*Adjusted for diabetes, hypertension, smoking, age, poverty index, and race.
